# Supplementary material for: Role of the volume conductor on simulations of local field potential recordings from deep brain stimulation electrodes
Source: PLoS One. 2023 Nov 27;18(11):e0294512. doi: 10.1371/journal.pone.0294512 (PMC10681243; doi:10.1371/journal.pone.0294512)
Supplement: S1 File — (PDF) [file pone.0294512.s001.pdf]

## Supporting information

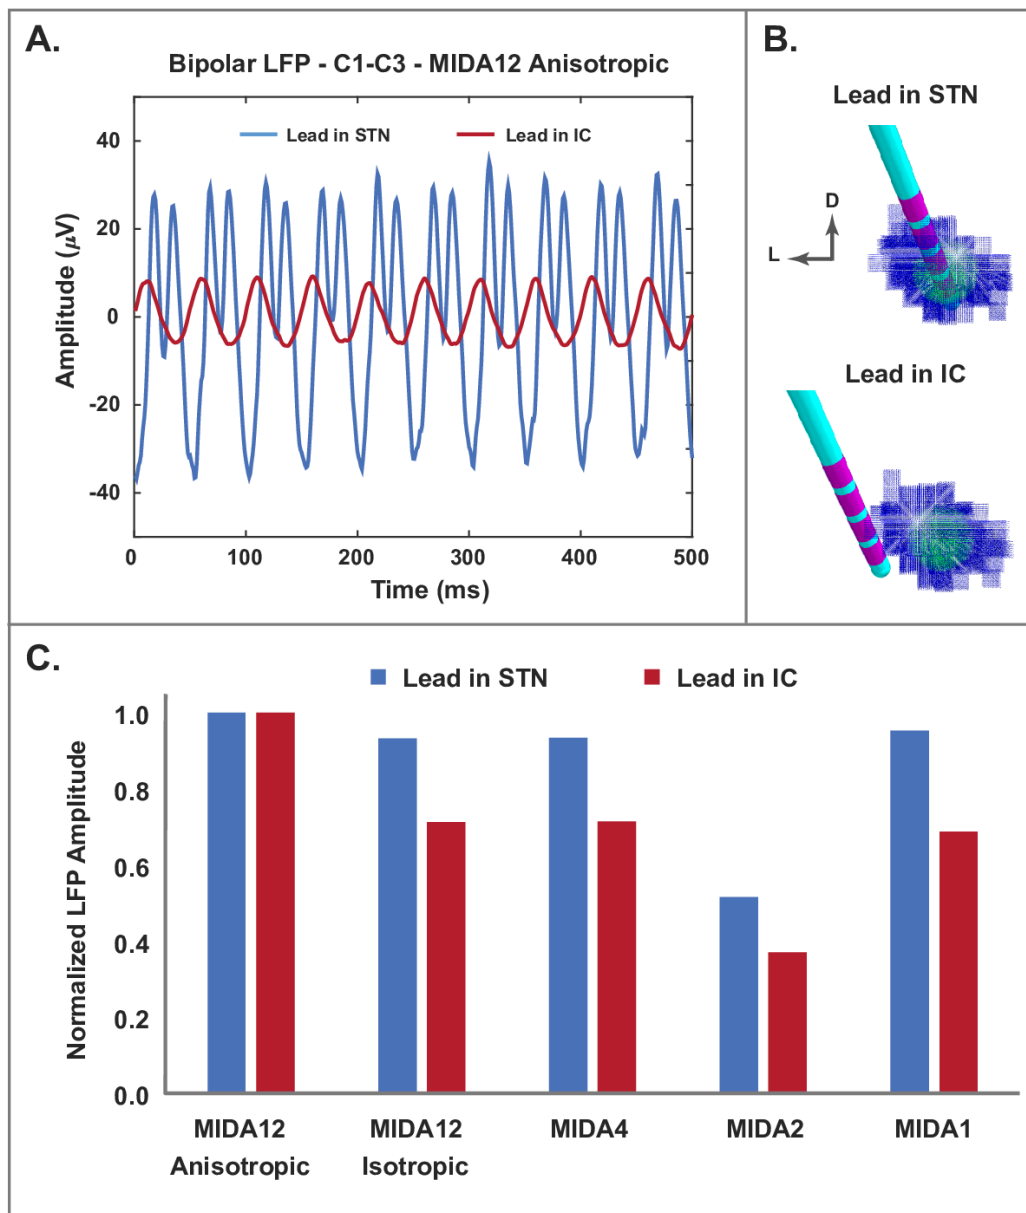

**S1 Fig: Effect of volume conductor complexity on simulated LFPs when the DBS lead was placed in the Subthalamic Nucleus (STN) and in the Internal Capsule (IC).** A) Bipolar LFP between contact 1 and 3 simulated with MIDA12 anisotropic volume conductor model. B) Coronal view depicting DBS lead in the STN and in the IC. C) Comparison of normalized LFP amplitude simulated using all five VC variants when the DBS lead was placed in the STN and in the IC. LFP amplitudes using different VC model variants were normalized with the amplitude of LFP simulated with MIDA12 anisotropic VC model.

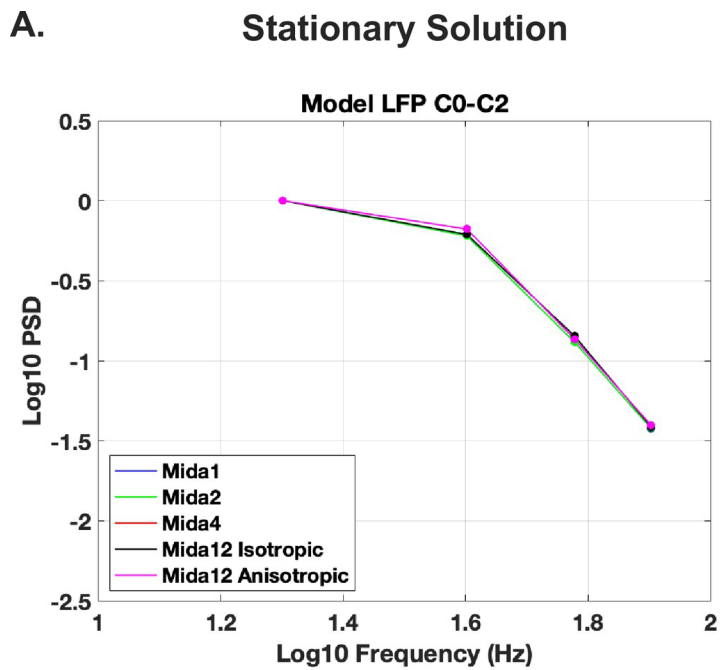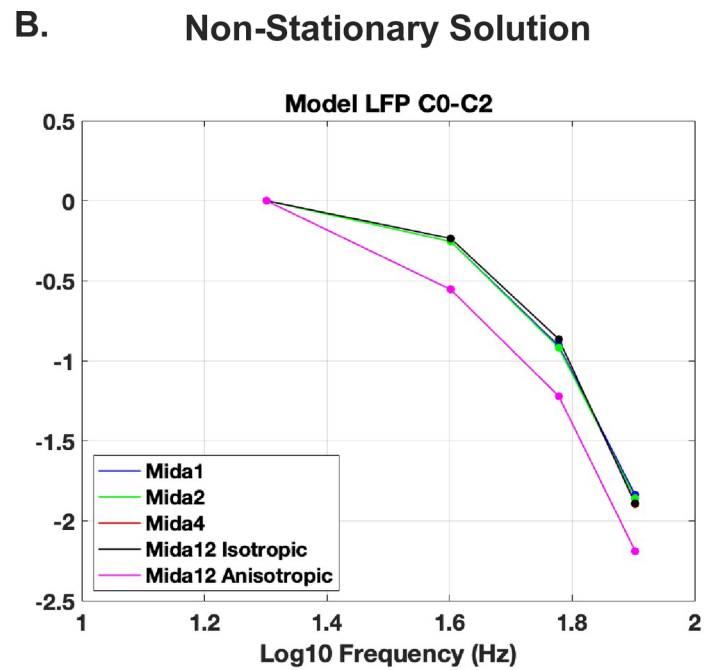

**S2 Fig: Effect of Volume Conductor Heterogeneity.** Log-Log plot of LFP Power Spectral Density (PSD) simulated with various VC models using a (A) Stationary solution (B) Non-stationary solution.

**S1 Table: Neuronal densities for each sector of the STN**

| STN Sector        | Neuronal Density, neurons / mm <sup>3</sup> |
|-------------------|---------------------------------------------|
| Anterior dorsal   | 1207                                        |
| Anterior central  | 1148                                        |
| Anterior ventral  | 1196                                        |
| Middle dorsal     | 1431                                        |
| Middle central    | 1472                                        |
| Middle ventral    | 1611                                        |
| Posterior dorsal  | 1269                                        |
| Posterior central | 1626                                        |
| Posterior ventral | 1872                                        |

**S2 Table: Ion Channel Conductances**

| Channel Conductances | Soma (S/cm <sup>2</sup> ) | Dendrites (S/cm <sup>2</sup> ) |
|----------------------|---------------------------|--------------------------------|
| Na                   | 1.11e-2                   | 6.5e-8                         |
| NaP or NaL           | 0.83e-5                   | 5.26e-6                        |
| KDR                  | 3.84e-3                   | 3.84e-3                        |
| Kv31                 | 1.61e-2                   | 1.5e-2                         |
| sKCa                 | 1.23e-4                   | 1.00e-4                        |
| HCN                  | 1.01e-3                   | 1.00e-3                        |
| CaT                  | 0.00                      | 1.00e-3                        |
| CaN                  | 1.15e-3                   | 1.20e-2                        |
| CaL                  | 9.50e-4                   | 2.00e-3                        |

**Jitter added to the synchronous neurons**

Scipy function *truncnorm.rvs* (with  $\pm 2$  bounds) was used to generate jitter from a truncated normal distribution. This jitter when added to the spike times give rise to synchronous neuron synaptic input timing.

**Jitter added to the asynchronous neurons**

Numpy function *random.exponential()* was used to generate jitter from an exponential distribution. This jitter when added to the spike times give rise to asynchronous neuron synaptic input timing.
